# Supplementary material for: Linear Dimensional Change in Acrylic Denture Teeth Positions Factored by Different Processing Techniques and Occlusal Forms: An In Vitro Study
Source: MDPI journal article supplement (doi:10.3390/app12147058), 2022-07-13
Supplement: s1 [file s1]

**Table S1: Shapiro Wilk Normality test used to check the normality of data without taking into account the absolute value of differences**

| p value                               | Change in Vertical Right Molar Dimension | Change in Vertical Left Molar Dimension | Change in Vertical Incisor Dimension | Change in Horizontal Right Molar Dimension | Change in Horizontal Left Molar Dimension | Change in Horizontal Incisor Dimension |
|---------------------------------------|------------------------------------------|-----------------------------------------|--------------------------------------|--------------------------------------------|-------------------------------------------|----------------------------------------|
| Non Anatomic Conventional Processing  | 0.658                                    | 0.818                                   | 0.811                                | 0.055                                      | 0.359                                     | 0.024                                  |
| Non Anatomic Injection Molded         | 0.551                                    | 0.836                                   | 0.799                                | 0.194                                      | 0.852                                     | 0.824                                  |
| Semi Anatomic Conventional Processing | 0.603                                    | 0.266                                   | 0.022                                | 0.145                                      | 0.685                                     | 0.292                                  |
| Semi Anatomic Injection Molded        | 0.220                                    | 0.174                                   | 0.306                                | 0.316                                      | 0.047                                     | 0.256                                  |

**Table S2: Shapiro Wilk Normality test used to check the normality of data after absolute value of differences was taken into account**

| p value                               | Dimensional Change in Vertical Right Molar Dimension | Dimensional Change in Vertical Left Molar Dimension | Dimensional Change in Vertical Incisor Dimension | Dimensional Change in Horizontal Right Molar Dimension | Dimensional Change in Horizontal Left Molar Dimension | Dimensional Change in Horizontal Incisor Dimension |
|---------------------------------------|------------------------------------------------------|-----------------------------------------------------|--------------------------------------------------|--------------------------------------------------------|-------------------------------------------------------|----------------------------------------------------|
| Non Anatomic Conventional Processing  | 0.298                                                | 0.296                                               | 0.124                                            | 0.915                                                  | 0.819                                                 | 0.012                                              |
| Non Anatomic Injection Molded         | 0.618                                                | 0.581                                               | 0.115                                            | 0.201                                                  | 0.134                                                 | 0.103                                              |
| Semi Anatomic Conventional Processing | 0.163                                                | 0.682                                               | 0.020                                            | 0.564                                                  | 0.326                                                 | 0.011                                              |
| Semi Anatomic Injection Molded        | 0.091                                                | 0.268                                               | 0.014                                            | 0.049                                                  | 0.009                                                 | 0.273                                              |
